# Supplementary material for: Significant Correlation Between the Infant Gut Microbiome and Rotavirus Vaccine Response in Rural Ghana
Source: PubMed Central journal article supplement (PMC5225256; doi:10.1093/infdis/jiw518), 2016-10-31

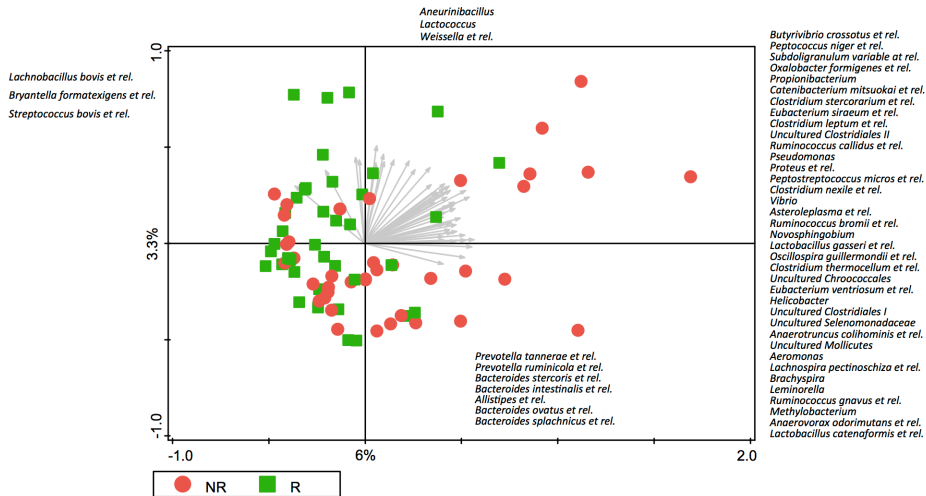

Supplement: jiw518supp2.pdf [file jiw518supp2.pdf]
